# Supplementary material for: In search of alternatively spliced alpha‐Klotho Kl1 protein in mouse brain
Source: PubMed Central journal article supplement — FASEB Bioadv. 2021 May 19;3(7):531–40. doi: 10.1096/fba.2020-00066 (PMC8255843; doi:10.1096/fba.2020-00066), 2021-05-19
Supplement: FBA2-3-531-s002.pdf [file FBA2-3-531-s002.pdf]

## Supplemental Information

**Supplemental Figure 1. A.** IB of the wild type (WT) mouse brain tissue, the kloθο hypomorph (*kl/kl*) brain tissue, and the spK11 transiently transfected cell lysate, representing the positive control for the 70 kDa band for spliced KL1, using anti-KL1 and anti-spE15. The anti-KL1 IB shows a 130 kDa band in the WT brain which is not present in the kloθο hypomorph (*kl/kl*) brain. The presence of 2 lower bands, ~100 kDa and ~80 kDa are visible in both the WT and *kl/kl* brain tissue, which renders them to be “non-kloθο” protein bands. **B.** IP and IB of the WT and *kl/kl* mouse brain tissue, using our SB48 synthetic anti- $\alpha$ Kloθο<sup>53</sup> on top and anti-KL1 at the bottom, for IP of KL1. The IB was performed using KM2076 (anti-KL1) and anti-spE15 respectively. In all four immunoblots, no full-length  $\alpha$ kloθο (130 kDa) or KL1 (~75 kDa) was precipitated from the kloθο hypomorph (*kl/kl*) brain tissue as compared to the WT brain tissue where both bands can be seen in the anti-KL1 IB. These positive Kloθο bands in the WT brain though, cannot be detected in the anti-spE15 IB, nor can any 70 kDa band be seen for the *kl/kl* brain. A fainter set of bands nearing 150 kDa can be seen in both WT and *kl/kl* in the IP: anti-KL1/IB: anti-spE15 combo, which are most-likely non-specific.

Supplemental Table 1:  $\alpha$ -Klotho PCR primers

|                                                                      |                                                                                                                                                       |
|----------------------------------------------------------------------|-------------------------------------------------------------------------------------------------------------------------------------------------------|
| <b>A. Human full-length transmembrane <math>\alpha</math>-Klotho</b> | 5'-<br>TGATAGGATCCGCCGCCACCATGCCCCGCCAGCGCCCCGCCGC-3'<br>5'-CGTCCTCTAGAGGTGTAAAAAACTGCAC-3'                                                           |
| <b>B. Human <math>\alpha</math>-Klotho peptides</b>                  |                                                                                                                                                       |
| Peptide A:                                                           | 5'-TGATAGGATCCGCCGCCACCATGCCCCGCCAGCGCCCCGCCGC-3'<br>5'-CGTCCTCTAGAGGGGTTGTCGATGGTGAT-3'                                                              |
| Peptide B:                                                           | 5'-TGATAGGATCCGCCGCCACCATGGAGGGGCTGCGCTACTA-3'<br>5'-CGTCCTCTAGAGTGAGGGTCCAAAAGTTG-3'                                                                 |
| Peptide C:                                                           | 5'-TGATAGGATCCGCCGCCACCATGATGACCGACCACAGCAT-3'<br>5'-CGTCCTCTAGATACTTGAATGTAGTTGTCAAC-3'                                                              |
| Peptide D:                                                           | 5'-TGATAGGATCCGCCGCCACCATGGATACCACTCTGTCTCAG-3'<br>5'-CGTCCTCTAGAGGCCACCTCTTTGTCC-3'                                                                  |
| Peptide E:                                                           | 5'-TGATAGGATCCGCCGCCACCATGCTCGGCCATCACGTCAAGC-3'<br>5'-CGTCCTCTAGAGTACATGGGGAGGTCTC-3'                                                                |
| Peptide F:                                                           | 5'-TGATAGGATCCGCCGCCACCATGCTAATCCAGGGTACCTTTG-3'<br>5'-CGTCCTCTAGAGGTGTGAAAAAACTGCAC-3'                                                               |
| <b>C. Mouse full-length soluble Klotho</b>                           | 5'-TGATAGAATTCGCCGCCACCATGCTAGCCCGCGCCCCTCCT-3'<br>5'-CAGCTGCGGCCGCTCATTCAAGGGGCTGGTTTTTC-3'                                                          |
| <b>D. Mouse Splice K11</b>                                           | 5'-TGATAGAATTCGCCGCCACCATGCTAGCCCGCGCCCCTCCT-3'<br>5'-<br>CAGCTTCTAGAGTGAGGAAGCAAGAGGCCGACACTGGGTTTTGTC<br>AA<br>AGGACTTACTTGAACGTAGTTGTCAACAACTCC-3' |

**Supplemental table 2** Primers used for detection of klotho transcript.

|                                          |                                                                                                                        |
|------------------------------------------|------------------------------------------------------------------------------------------------------------------------|
| Pf1, Pr1 for mKL:                        | Pf1 5' ATGCTAGCCCGCGCCC 3'<br>Pr1 5' ATCCACATTCGGTGCAC 3'                                                              |
| Pf1, Pr2 for mKL1:                       | Pf1 5' ATGCTAGCCCGCGCCC 3'<br>Pr2 5' GTTGTCAACAACCTCCCC 3'                                                             |
| Pf1, Pr3 for spKL1:                      | Pf1 5' ATGCTAGCCCGCGCCC 3'<br>Pr3 5' TTAGTGAGGAAGCAAGA 3'                                                              |
| Pf2, Pf3, Pr3 for 50KDa protein (spKL1): | Pf2 5' TGGCAGGGGTATGCCAC 3'<br>Pr3 5' TTAGTGAGGAAGCAAGA 3'<br>Pf3 5' CTGGTTGCCACAACT 3'<br>Pr3 5' TTAGTGAGGAAGCAAGA 3' |
